# Supplementary material for: Secondary metabolites of Bacillus subtilis impact the assembly of soil-derived semisynthetic bacterial communities
Source: PubMed Central journal article supplement (PMC7722629; doi:10.3762/bjoc.16.248), 2020-12-04
Supplement: Beilstein_J_Org_Chem-16-2983-s001.pdf [file Beilstein_J_Org_Chem-16-2983-s001.pdf]

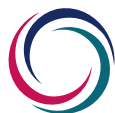

## Supporting Information

for

### **Secondary metabolites of *Bacillus subtilis* impact the assembly of soil-derived semisynthetic bacterial communities**

Heiko T. Kiesevalter, Carlos N. Lozano-Andrade, Mikael L. Strube and Ákos T. Kovács

*Beilstein J. Org. Chem.* **2020**, *16*, 2983–2998. [doi:10.3762/bjoc.16.248](https://doi.org/10.3762/bjoc.16.248)

### **Bacterial strains used in this study, 16S rRNA V3-V4 primer list, number of sequencing reads per sample, and supporting figures**

## Supporting tables

**Table S1.** Bacterial strains used in this study.

| Strains | Characteristics                                                         | Reference |
|---------|-------------------------------------------------------------------------|-----------|
| P5_B1   | <i>B. subtilis</i> soil isolate from sampling site 55.788800, 12.558300 | [1]       |
| DTUB55  | P5_B1 <i>sfp</i> :: <i>mls</i>                                          | [2]       |
| DTUB79  | P5_B1 <i>srfAC</i> :: <i>Tn10</i> (Spec <sup>R</sup> )                  | [1]       |
| DTUB102 | P5_B1 $\Delta$ <i>pksL</i> (Chl <sup>R</sup> )                          | [2]       |
| DTUB125 | P5_B1 $\Delta$ <i>ppsC</i> (Tet <sup>R</sup> )                          | [2]       |
| M5      | <i>Lysinibacillus fusiformis</i>                                        | [3]       |

## REFERENCES

1. Thérien, M.; Kiesevalter, H. T.; Auria, E.; Charron-Lamoureux, V.; Wibowo, M.; Maróti, G.; Kovács, Á. T.; Beauregard, P. B. *Biofilm* **2020**, *2*, 100021.
2. Kiesevalter, H. T.; Lozano-Andrade, C. N.; Wibowo, M.; Strube, M. L.; Maróti, G.; Snyder, D.; Jørgensen, T. S.; Larsen, T. O.; Cooper, V. S.; Weber, T.; Kovács, Á. T. *bioRxiv* **2020**, 2020.08.05.238063.
3. Gallegos-Monterrosa, R.; Kankel, S.; Götze, S.; Barnett, R.; Stallforth, P.; Kovács, Á. T. *J. Bacteriol.* **2017**, *199*, e00204-17.

**Table S2.** 16S rRNA V3-V4 primer used in this study

| <b>Name</b>  | <b>Barcode</b> | <b>Primer</b>         |
|--------------|----------------|-----------------------|
| V3V4_forw_1  | TTTTAATC       | CCTACGGGNGGCWGCAG     |
| V3V4_rev_1   | TTTTAATC       | GACTACHVGGGTATCTAATCC |
| V3V4_forw_2  | ATAATTAG       | CCTACGGGNGGCWGCAG     |
| V3V4_rev_2   | ATAATTAG       | GACTACHVGGGTATCTAATCC |
| V3V4_forw_3  | ACCAAATT       | CCTACGGGNGGCWGCAG     |
| V3V4_rev_3   | ACCAAATT       | GACTACHVGGGTATCTAATCC |
| V3V4_forw_4  | CTTATCAA       | CCTACGGGNGGCWGCAG     |
| V3V4_rev_4   | CTTATCAA       | GACTACHVGGGTATCTAATCC |
| V3V4_forw_5  | TGATCATT       | CCTACGGGNGGCWGCAG     |
| V3V4_rev_5   | TGATCATT       | GACTACHVGGGTATCTAATCC |
| V3V4_forw_6  | AGAATCTA       | CCTACGGGNGGCWGCAG     |
| V3V4_rev_6   | AGAATCTA       | GACTACHVGGGTATCTAATCC |
| V3V4_forw_7  | TCAAGAAA       | CCTACGGGNGGCWGCAG     |
| V3V4_rev_7   | TCAAGAAA       | GACTACHVGGGTATCTAATCC |
| V3V4_forw_8  | ATCGAAAT       | CCTACGGGNGGCWGCAG     |
| V3V4_rev_8   | ATCGAAAT       | GACTACHVGGGTATCTAATCC |
| V3V4_forw_9  | ACATTTAC       | CCTACGGGNGGCWGCAG     |
| V3V4_rev_9   | ACATTTAC       | GACTACHVGGGTATCTAATCC |
| V3V4_forw_10 | TAGAAAAC       | CCTACGGGNGGCWGCAG     |
| V3V4_rev_10  | TAGAAAAC       | GACTACHVGGGTATCTAATCC |
| V3V4_forw_11 | TTATCACC       | CCTACGGGNGGCWGCAG     |
| V3V4_rev_11  | TTATCACC       | GACTACHVGGGTATCTAATCC |
| V3V4_forw_12 | AATAGGGT       | CCTACGGGNGGCWGCAG     |
| V3V4_rev_12  | AATAGGGT       | GACTACHVGGGTATCTAATCC |
| V3V4_forw_13 | ATTGCTGA       | CCTACGGGNGGCWGCAG     |
| V3V4_rev_13  | ATTGCTGA       | GACTACHVGGGTATCTAATCC |
| V3V4_forw_14 | TGAGTTCT       | CCTACGGGNGGCWGCAG     |
| V3V4_rev_14  | TGAGTTCT       | GACTACHVGGGTATCTAATCC |
| V3V4_forw_15 | GGCTATTT       | CCTACGGGNGGCWGCAG     |
| V3V4_rev_15  | GGCTATTT       | GACTACHVGGGTATCTAATCC |
| V3V4_forw_16 | CAAGAGAT       | CCTACGGGNGGCWGCAG     |
| V3V4_rev_16  | CAAGAGAT       | GACTACHVGGGTATCTAATCC |
| V3V4_forw_17 | GGAATACA       | CCTACGGGNGGCWGCAG     |
| V3V4_rev_17  | GGAATACA       | GACTACHVGGGTATCTAATCC |
| V3V4_forw_18 | AAGGCAAT       | CCTACGGGNGGCWGCAG     |
| V3V4_rev_18  | AAGGCAAT       | GACTACHVGGGTATCTAATCC |
| V3V4_forw_19 | ACAAAACG       | CCTACGGGNGGCWGCAG     |
| V3V4_rev_19  | ACAAAACG       | GACTACHVGGGTATCTAATCC |
| V3V4_forw_21 | TTGAGTGA       | CCTACGGGNGGCWGCAG     |
| V3V4_rev_21  | TTGAGTGA       | GACTACHVGGGTATCTAATCC |
| V3V4_forw_22 | GCTTCTGA       | CCTACGGGNGGCWGCAG     |
| V3V4_rev_22  | GCTTCTGA       | GACTACHVGGGTATCTAATCC |
| V3V4_forw_23 | GGCAAGAT       | CCTACGGGNGGCWGCAG     |
| V3V4_rev_23  | GGCAAGAT       | GACTACHVGGGTATCTAATCC |

|              |          |                       |
|--------------|----------|-----------------------|
| V3V4_forw_24 | GTGCTTTC | CCTACGGGNGGCWGCAG     |
| V3V4_rev_24  | GTGCTTTC | GACTACHVGGGTATCTAATCC |
| V3V4_forw_25 | ACACACTG | CCTACGGGNGGCWGCAG     |
| V3V4_rev_25  | ACACACTG | GACTACHVGGGTATCTAATCC |
| V3V4_forw_26 | CGATTCTG | CCTACGGGNGGCWGCAG     |
| V3V4_rev_26  | CGATTCTG | GACTACHVGGGTATCTAATCC |
| V3V4_forw_27 | GCAGAGTT | CCTACGGGNGGCWGCAG     |
| V3V4_rev_27  | GCAGAGTT | GACTACHVGGGTATCTAATCC |
| V3V4_forw_28 | CGTCCTAT | CCTACGGGNGGCWGCAG     |
| V3V4_rev_28  | CGTCCTAT | GACTACHVGGGTATCTAATCC |
| V3V4_forw_30 | GCTTGGTT | CCTACGGGNGGCWGCAG     |
| V3V4_rev_30  | GCTTGGTT | GACTACHVGGGTATCTAATCC |
| V3V4_forw_31 | ACAGGCTT | CCTACGGGNGGCWGCAG     |
| V3V4_rev_31  | ACAGGCTT | GACTACHVGGGTATCTAATCC |
| V3V4_forw_33 | TGACGCTT | CCTACGGGNGGCWGCAG     |
| V3V4_rev_33  | TGACGCTT | GACTACHVGGGTATCTAATCC |

**Table S3.** Number of reads per sample.

| <b>Sample</b>          | <b>Number of reads</b> |
|------------------------|------------------------|
| Soil 1                 | 751                    |
| Soil 2                 | 12,660                 |
| Pre 1                  | 20,440                 |
| Pre 2                  | 17,787                 |
| Pre 3                  | 15,471                 |
| Pre 4                  | 34,802                 |
| Control 1              | 4,649                  |
| Control 2              | 20,846                 |
| Control 3              | 16,229                 |
| Control 4              | 16,556                 |
| WT 1                   | 12,436                 |
| WT 2                   | 18,554                 |
| WT 3                   | 18,182                 |
| WT 4                   | 11,964                 |
| <i>sfp</i> 1           | 13,354                 |
| <i>sfp</i> 2           | 16,737                 |
| <i>sfp</i> 3           | 12,472                 |
| <i>sfp</i> 4           | 21,421                 |
| <i>srfAC</i> 1         | 7,047                  |
| <i>srfAC</i> 2         | 1,184                  |
| <i>srfAC</i> 3         | 3,563                  |
| <i>srfAC</i> 4         | 7,663                  |
| $\Delta$ <i>pksL</i> 1 | 11,017                 |
| $\Delta$ <i>pksL</i> 2 | 2,115                  |
| $\Delta$ <i>pksL</i> 3 | 7,063                  |
| $\Delta$ <i>pksL</i> 4 | 5,187                  |
| $\Delta$ <i>ppsC</i> 1 | 9,443                  |
| $\Delta$ <i>ppsC</i> 2 | 10,823                 |
| $\Delta$ <i>ppsC</i> 3 | 9,947                  |
| $\Delta$ <i>ppsC</i> 4 | 2,112                  |

## Supporting figures

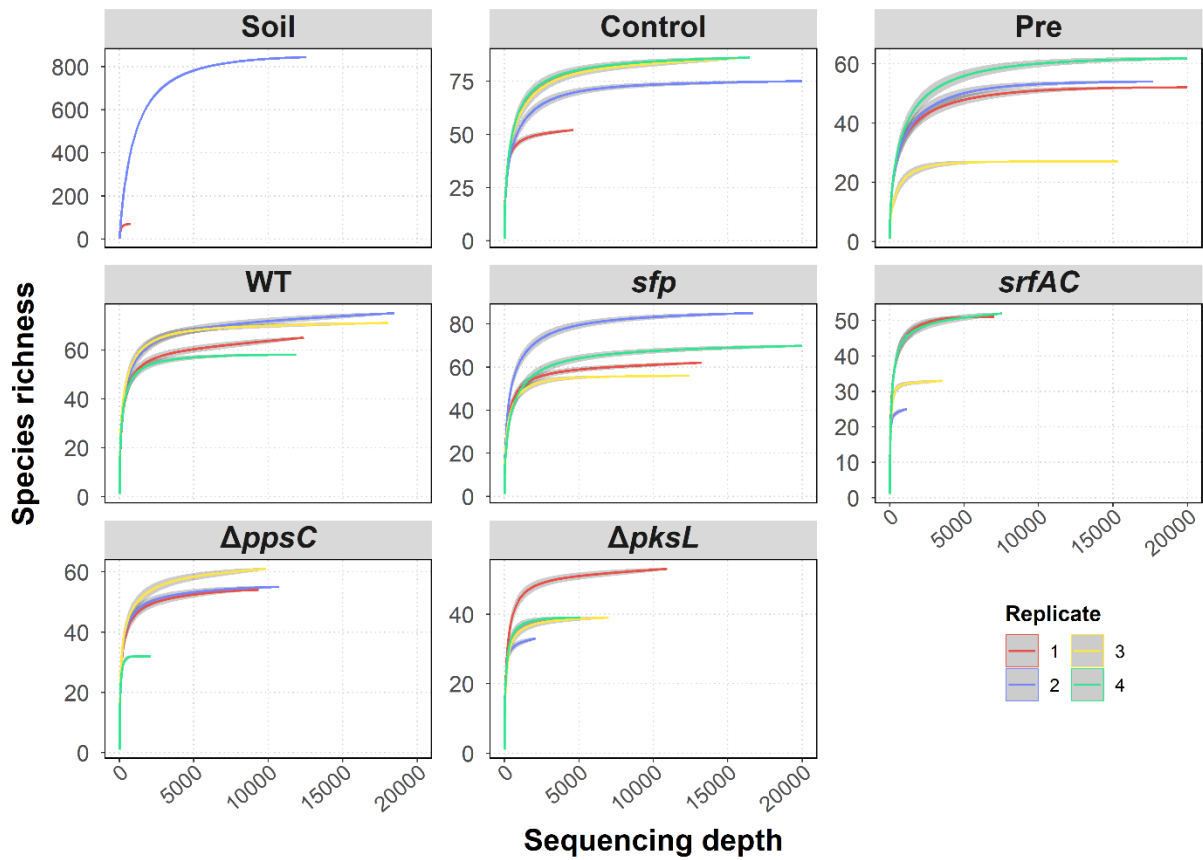

**Figure S1.** Rarefaction curves for each assay and replicate. Species richness is visualised for sampling depths from 0 to 20,000.

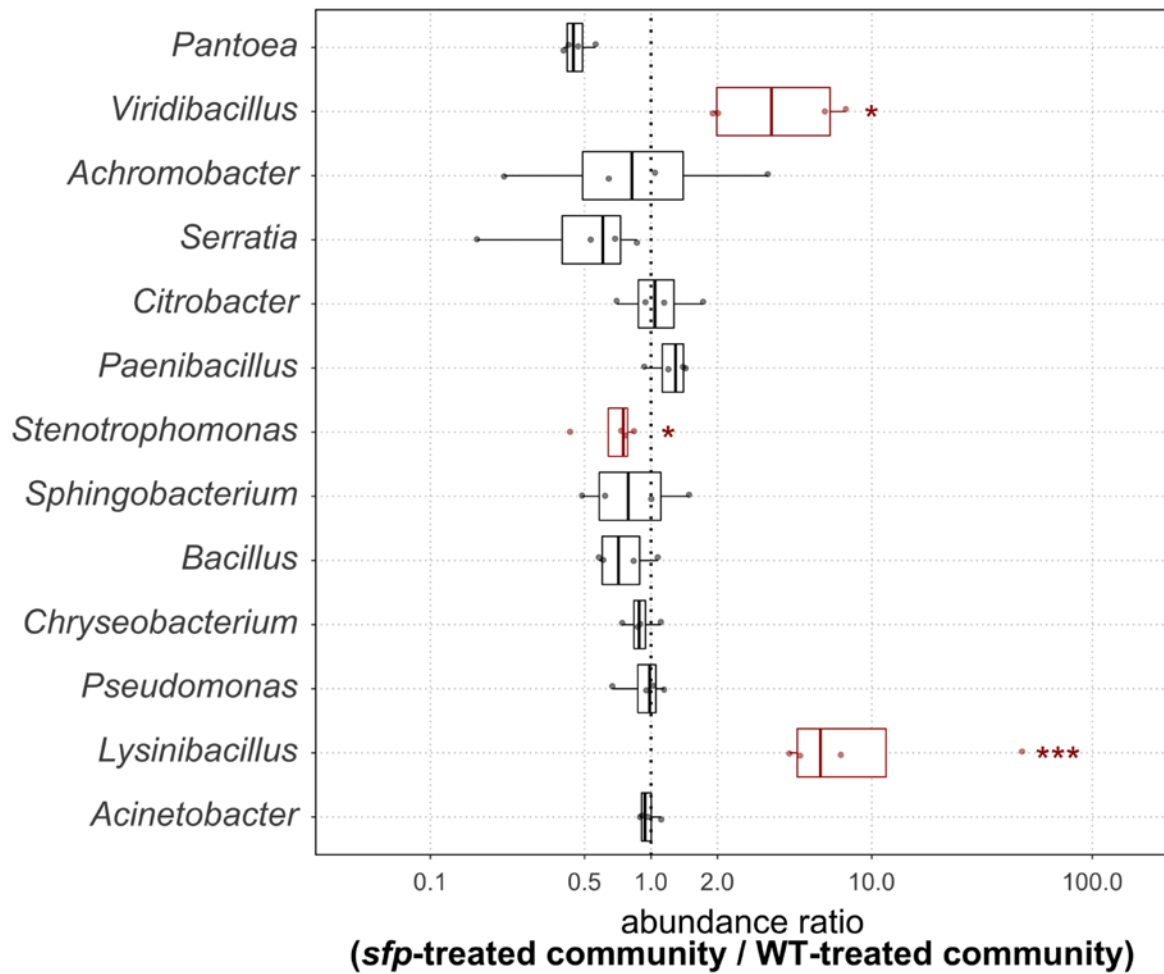

**Figure S2.** Abundance ratios for each genus and replicate (points) in the *sfp*-treated community compared to the WT-treated community. Statistical significance is defined as  $P \leq 0.05$  (\*) and  $P \leq 0.001$  (\*\*\*)

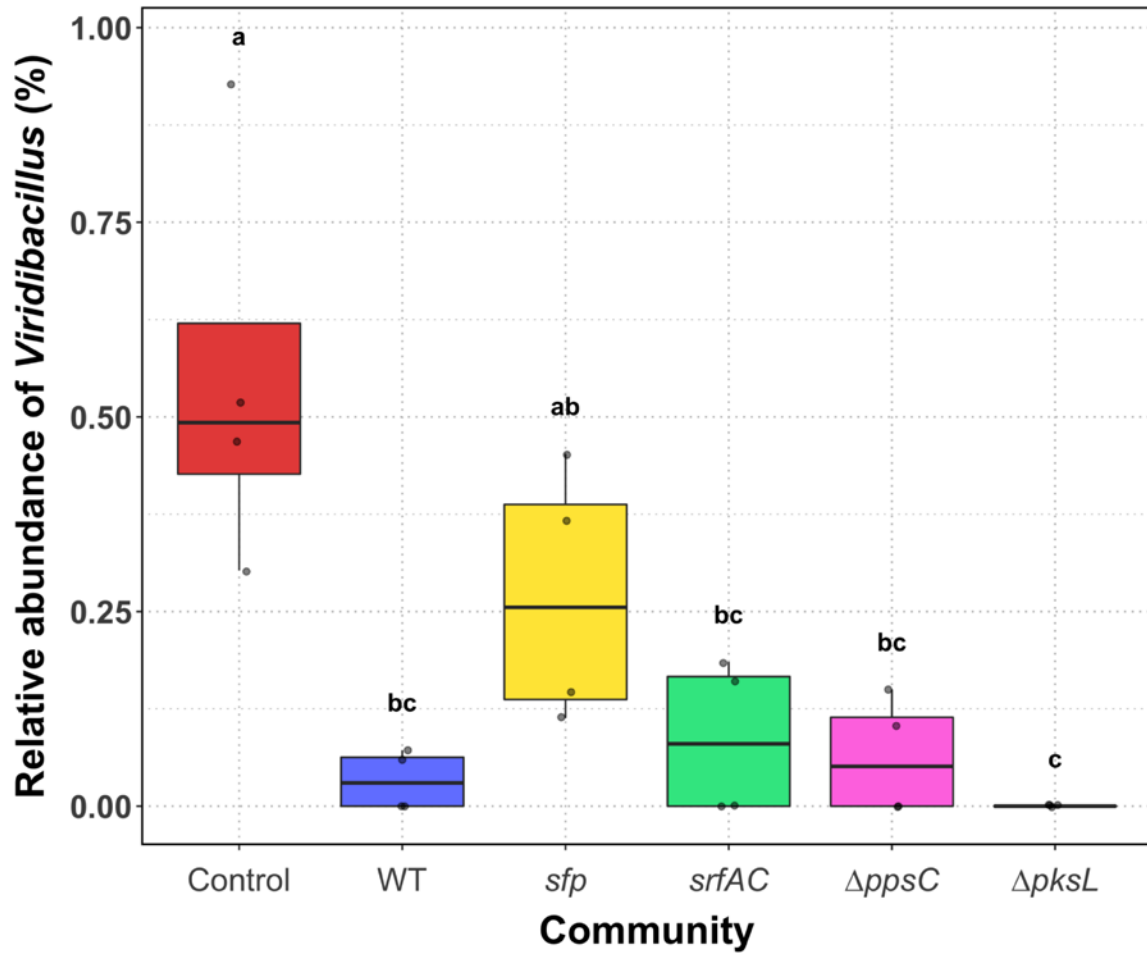

**Figure S3.** Abundance of *Viridibacillus* in the untreated mock communities (Control) and treated mock communities with either *B. subtilis* wild type (WT), NRPs deficient strain (*sfp*), surfactin mutant (*srfAC*), plipastatin mutant ( $\Delta ppsC$ ) or bacillaene mutant ( $\Delta pksL$ ) and co-cultivated for 48 h. Points represent the abundance in each replicate. Treatments with varying letters are significantly different ( $P < 0.05$ ).



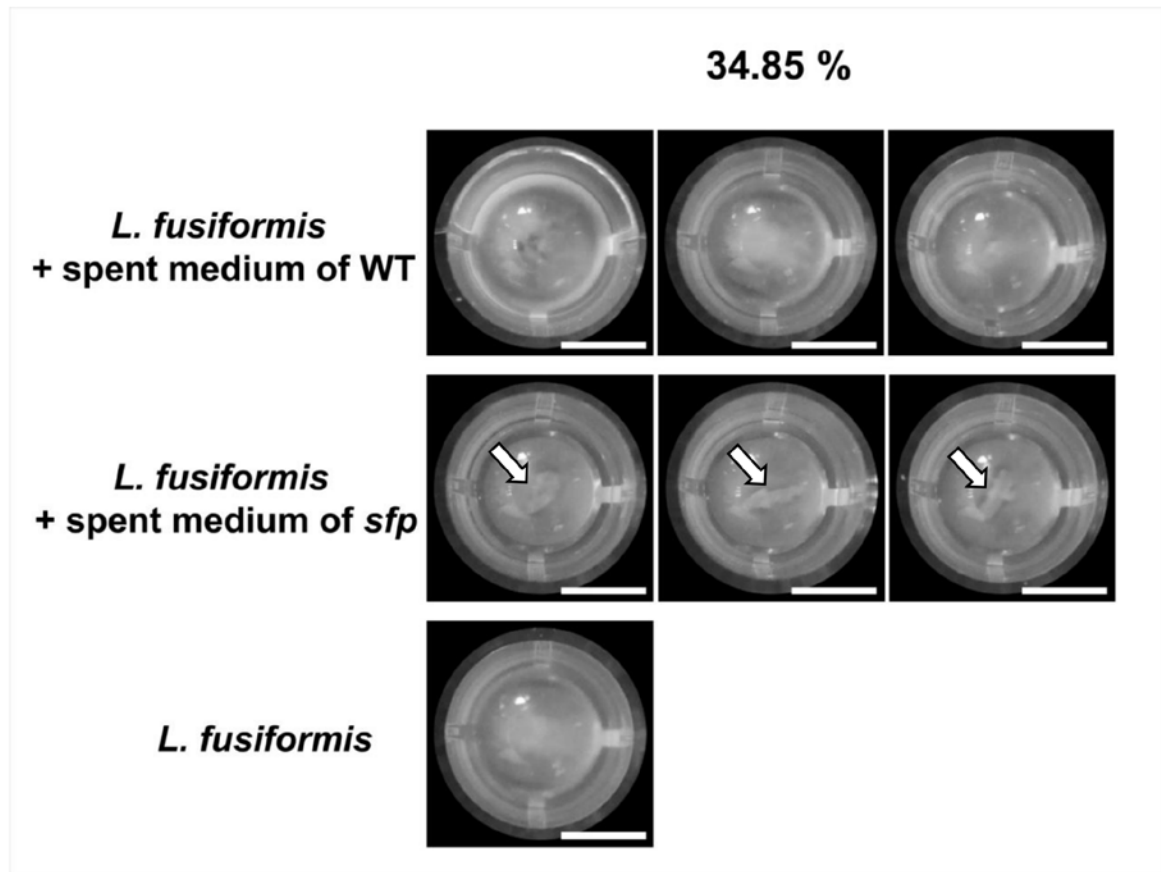

**Figure S4.** Different levels of aggregation of *L. fusiformis* M5 after exposure to spent medium of *B. subtilis* WT and *sfp* or without treatment. Solid aggregates in assays supplemented with spent medium of *sfp* are marked with arrows. Scale bars indicate 3 mm.

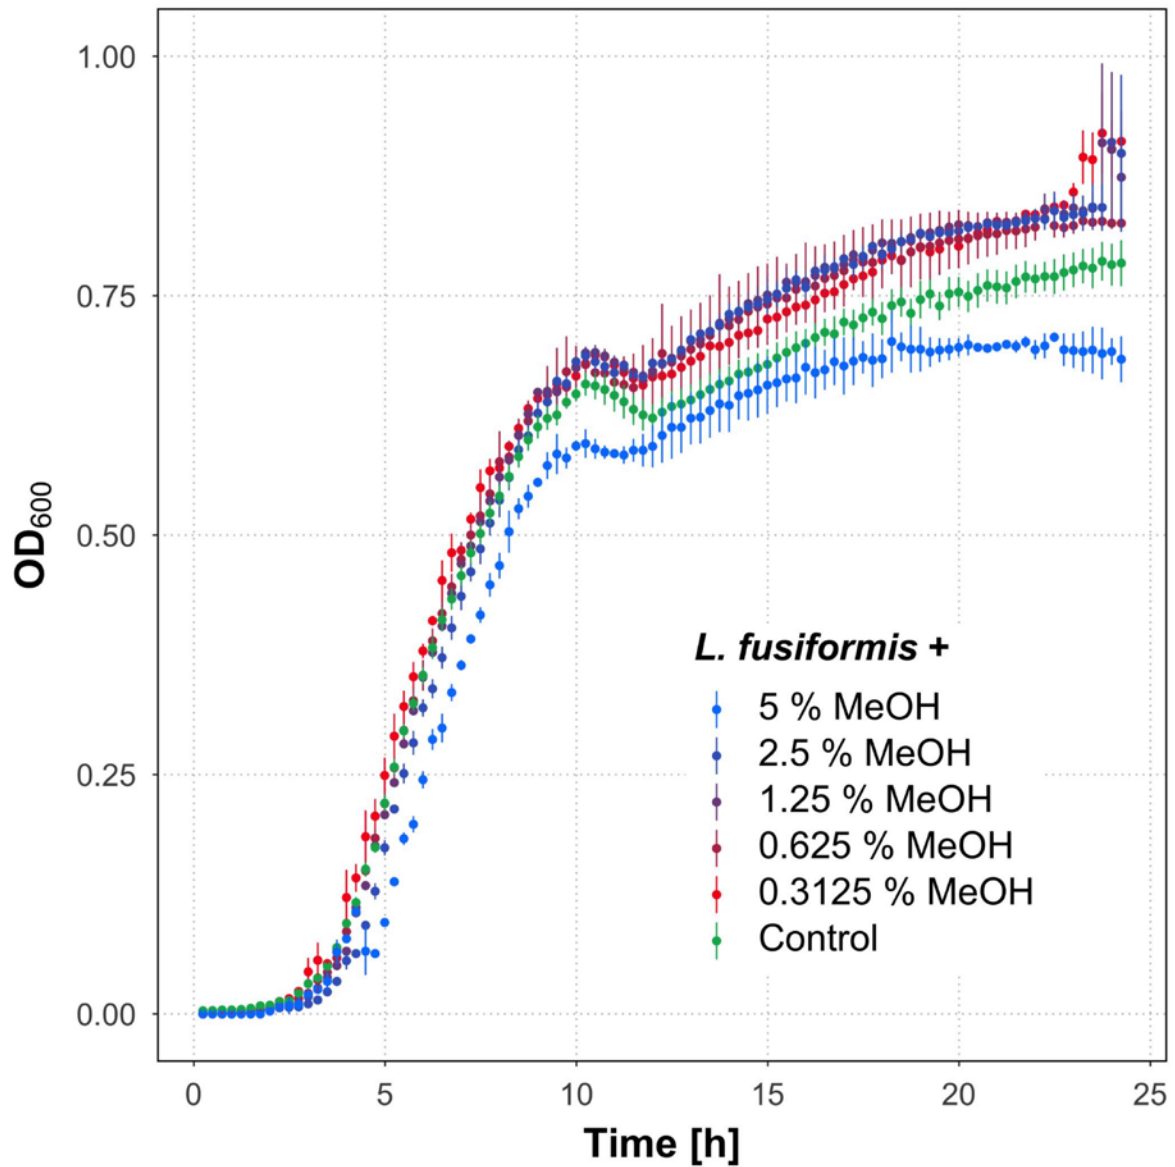

**Figure S5.** Growth curves of *L. fusiformis* M5 exposed to different concentrations of the solvent MeOH and without treatment (control). Error bars represent the standard error. N = 6 (control assay), N = 2 (MeOH-treated assays)
